# Supplementary material
Source: PubMed Central journal article supplement (PMC2649967)
Supplement: NIHMS86157-supplement-supplement_1.pdf [file NIHMS86157-supplement-supplement_1.pdf]

- Thoms S., Erdmann R. 2006. Peroxisomal matrix protein receptor ubiquitination and recycling. *Biochim Biophys Acta* 1763: 1620-1628.
- Walter C., Gootjes J., Mooijer P. A., Portsteffen H., Klein C., Waterham H. R., Barth P. G., Epplen J. T., Kunau W. H., Wanders R. J., Dodt G. 2001. Disorders of peroxisome biogenesis due to mutations in PEX1: phenotypes and PEX1 protein levels. *Am J Hum Genet* 69: 35-48.
- Wanders R. J., Waterham H. R. 2005. Peroxisomal disorders I: biochemistry and genetics of peroxisome biogenesis disorders. *Clin Genet* 67: 107-133.
- Wanders R. J., Waterham H. R. 2006. Biochemistry of mammalian peroxisomes revisited. *Annu Rev Biochem* 75: 295-332.
- Warren D. S., Wolfe B. D., Gould S. J. 2000. Phenotype-genotype relationships in PEX10-deficient peroxisome biogenesis disorder patients. *Hum Mutat* 15: 509-521.
- Weller S., Cajigas I., Morrell J., Obie C., Steel G., Gould S. J., Valle D. 2005. Alternative splicing suggests extended function of PEX26 in peroxisome biogenesis. *Am J Hum Genet* 76: 987-1007.
- Weller S., Gould S. J., Valle D. 2003. Peroxisome biogenesis disorders. *Annu Rev Genomics Hum Genet* 4: 165-211.
- Yahraus T., Braverman N., Dodt G., Kalish J. E., Morrell J. C., Moser H. W., Valle D., Gould S. J. 1996. The peroxisome biogenesis disorder group 4 gene, PXAAA1, encodes a cytoplasmic ATPase required for stability of the PTS1 receptor. *Embo J* 15: 2914-2923.
- Zeharia A., Ebberink M. S., Wanders R. J., Waterham H. R., Gutman A., Nissenkorn A., Korman S. H. 2007. A novel PEX12 mutation identified as the cause of a peroxisomal biogenesis disorder with mild clinical phenotype, mild biochemical abnormalities in fibroblasts and a mosaic catalase immunofluorescence pattern, even at 40 degrees C. *J Hum Genet* 52: 599-606.

**Supporting Table S1 (following page): Primer Sequences**

Supplemental Table 1. Primer Sequences

| Gene  | Exon                       | Forward sequence (5' - 3') <sup>a</sup>  | Reverse sequence (5' - 3') <sup>a</sup> | Begin <sup>b</sup> | End <sup>c</sup> |
|-------|----------------------------|------------------------------------------|-----------------------------------------|--------------------|------------------|
| PEX1  | 1                          | <u>GAACCCAGAGCGACGCTC</u>                | CTGAAGATCAGGTGGCTC                      | 7 <sup>d</sup>     | 16               |
|       | 2                          | GAATCCAGAAAAATGTATAC                     | CAGAGTATAGTCAGCTTC                      | 36                 | 142              |
|       | 3                          | TACTCCAGAAATGGGTGACAG                    | GCTAAAGACATTGATATTGTG                   | 180                | 47               |
|       | 4                          | TAAGTAGATATGGAGTGGAC                     | CTATAGTGTAGAATATGACAG                   | 41                 | 22               |
|       | 5a                         | GCTGTCATATTCTACACTATAG                   | <u>CAGAGGTTGCTGACGCGTTA</u>             | 55                 | 421 <sup>e</sup> |
|       | 5b                         | <u>GCAGTCAAAGGTTGTTTCT</u>               | GCCACATAAAAATTTCTCCC                    | 355 <sup>e</sup>   | 22               |
|       | 6                          | TGGACTGAGACAACACTATGAG                   | ACTTAGCTAAAGCAACTAGA                    | 126                | 54               |
|       | 7                          | GTTAAGTTCAGATATGAGG                      | GTATGACAGGTTGCAAGAAC                    | 30                 | 59               |
|       | 8                          | GTTTCAGTACTAACTCTGC                      | GTTACAAGGAACTTCATAC                     | 23                 | 61               |
|       | 9                          | CTGGTATAACAGAATCAGC                      | GTCTAACATGCTAGTTTGGC                    | 81                 | 13               |
|       | 10                         | CTGGGAAGGCCAAAATTCAGC                    | CCTATATAAATAGATGGTC                     | 67                 | 70               |
|       | 11                         | GAGGCTGAATCTTGGTGG                       | GCATTATGTATAACATTCC                     | 71                 | 50               |
|       | 12                         | CGAGCTTTTCTAGTGTCTTC                     | GACTAAAATGCTGACTGAC                     | 68                 | 39               |
|       | 13                         | GGTCAACCTTAGAGTATC                       | GCCTCTAGCACAAATATGCAC                   | 79                 | 132              |
|       | 14                         | CACTATAGATTGTCAACCTG                     | GAAAGAAGATTCCAAGTTTCCAGG                | 76                 | 19               |
|       | 15                         | GTTTCCAGCTAAGATGATGG                     | CTTCTGGGAGTAAGTATTCAC                   | 64                 | 21               |
|       | 16                         | CTGTTTAGACTTGAGCTC                       | GAATGCATAAATGCCAGTG                     | 30                 | 78               |
|       | 17                         | GATTCATTTAGACTTAGTCAG                    | GTTTCAAATATCAGTCTTCTC                   | 60                 | 80               |
|       | 18                         | CCAACATGAAGCCTGATTC                      | TCTGATGACATGATGACAT                     | 29                 | 39               |
|       | 19                         | GTCATCATGTATCAGAT                        | GAGTGTAGCATTTGTTG                       | 31                 | 30               |
|       | 20                         | GGTACATTTCTCAACTTAC                      | CCATATCCAACATATGGAAC                    | 117                | 141              |
|       | 21                         | TGCCTCAAACCGTTAGAGAA                     | TATGTGGGCTGGTTAGGAG                     | 131                | 74               |
|       | 22                         | CACAGGTATCAGTGAACC                       | GCTCGTTTATAAGTCAAAG                     | 173                | 72               |
|       | 23                         | CCTTAATTTAACTCTTCGTC                     | GTAATAGTAGCTGTACTTCC                    | 20                 | 21               |
| 24    | GTTTGCCAACAATCCATTATC      | GGTTGAGCGGATAAATTAATG                    | 56                                      | 58                 |                  |
| PEX6  | 1a                         | AACCCCTCAGAGCAAGTTC                      | <u>CGACTGCTGTCCCAGAC</u>                | 137 <sup>d</sup>   | 506 <sup>e</sup> |
|       | 1b                         | <u>CGGAGAGACCCCTCCCAGT</u>               | GGGGCACGAGTCTAAATCT                     | 380 <sup>e</sup>   | 72               |
|       | 2                          | GAGAAGGTTATAACGTGGTG                     | GAGGGTGAGAAGCTATCCTC                    | 16                 | 22               |
|       | 3                          | CATTACTCCATGTGACCTG                      | CACATGATTTGCAGGGAG                      | 24                 | 65               |
|       | 4                          | GATTGAGAAACCTTGTCTTG                     | <u>CAGAGGAATCCACTCTCTG</u>              | 55                 | 120              |
|       | 5                          | CAAGGATGGGTGTAGACCAG                     | GATGTTCTAAGCAGGCTTTTC                   | 54                 | 29               |
|       | 6                          | CTAGATCTAAGGGATCTTGTG                    | GGAATATGCCGACCCACTG                     | 62                 | 119              |
|       | 7                          | GAGGTAGACTTGCCCA                         | CAATGTGCTGGGATTATAAG                    | 129                | 61               |
|       | 8                          | GCCGACTTTGGGACAAGGC                      | GCAACAGGACTGAGTCTTTC                    | 58                 | 54               |
|       | 9                          | CTGCTCATGTGTCCTTCC                       | CCATCTACATCCATTTCTCTC                   | 13                 | 32               |
|       | 10a                        | <u>CTGCACCAGGATCAAGAAC</u> <sup>f</sup>  | <u>CTGAATGGTCTCCAGGATC</u> <sup>g</sup> | 129                | 130              |
|       | 10b                        | <u>CAGGATCAAGAACTCAGGTA</u> <sup>f</sup> | <u>CTGAATGGTCTCCAGGATC</u> <sup>g</sup> | 121                | 130              |
|       | 11                         | GAGCAACTGCAGACAGCTC                      | CACACAATTGACCTCTTGG                     | 103                | 72               |
|       | 12                         | GTATGTGCATCTGACGGCTC                     | GAATGATCATGAGTAGCCTG                    | 26                 | 73               |
|       | 13                         | GATGCCAGTGTGTATTGTC                      | GACTGCTGTGAGCTTTTCTC                    | 88                 | 52               |
|       | 14                         | CTGCCGTAAAGAGAGGTAC                      | AGGCAGGTATAAGTTTCAG                     | 64                 | 68               |
|       | 15                         | <u>CAACAGACCAGATCTCCTG</u>               | CCTGCATGTTGCATGCATC                     | 125                | 54               |
| 16    | <u>CAAGTATGCTCTGTTAGAG</u> | GTAGCTGGGACTCAGGTGCAC                    | 129                                     | 52                 |                  |
| 17    | CTGAGCAGGAAGCCACTTC        | CTCACTCCAACCTTTTCATGC                    | 57                                      | 12                 |                  |
| PEX10 | 1                          | GACGCAGAGGTCTGCGCC                       | TGACCACACACGGCAGACAC                    | 94 <sup>d</sup>    | 68               |
|       | 2                          | GAGTGAGTGTGGCTTCATG                      | TCCAGGAGCTTCTCACACTG                    | 109                | 80               |
|       | 3                          | GGGCTCAAGGGCGACAAGATGG                   | GCATGCACCCAAGTCCAGTG                    | 103                | 51               |
|       | 4                          | GTTCTAACGTGCTCTGTG                       | CTTACAGGTCCTTGTGAAG                     | 85                 | 44               |
|       | 5                          | CTTCAAGGACCTGTAAAG                       | CTCAAACTGGAGGGTGTCTC                    | 36                 | 64               |
|       | 6                          | <u>GGTCATTAGTTGAAGGAAATAC</u>            | <u>GTGGCTGAGTCTACCAGG</u>               | 120                | 289 <sup>e</sup> |
| PEX12 | 1a                         | GTCATAGATTCTCTAGTTC                      | <u>CGAGGGTAGTCTCAAGAAG</u>              | 106                | 335 <sup>e</sup> |
|       | 1b                         | <u>TGCAGCATTTTGACAAGTTAC</u>             | CTAGGCTACCAATAAGCAC                     | 251 <sup>d</sup>   | 62               |
|       | 2                          | GGTGTAGAACTGTGTAAATG                     | GCCACAAAGTTAACAGGGAG                    | 35                 | 74               |
| 3     | GTCACCTTGTAAATGATACC       | <u>AGGCTGAGAAGTGTCAACTC</u>              | 46                                      | 474 <sup>e</sup>   |                  |
| PEX26 | 2                          | <u>TTCGCCCAGGCCAACT</u>                  | CGAGGTGTAAAGCTCCTTG                     | 74 <sup>d</sup>    | 91               |
|       | 3                          | GCTGGAGAGGAACAGTCCC                      | GATGAAAATCCTCTCGTTTC                    | 67                 | 35               |
|       | 4                          | GGATAGGAGAAGCATAGTG                      | GTTTCAGACAGACCCCGAGG                    | 72                 | 56               |
|       | 5                          | CTTAGAAGCAAGCACAGAGG                     | GTAGGACTCTGACAAACACC                    | 62                 | 70               |
| 6     | GATGGCAGAGTGACAGGTGA       | GCCAGGCAGGTTTTGAAC                       | 41                                      | 30                 |                  |

<sup>a</sup>sequences in regular type are intronic while those underlined reside within flanking exons unless otherwise indicated

<sup>b</sup>number of bases upstream 3'-base of the forward primer is from the 5'-base of the indicated exon

<sup>c</sup>number of bases downstream the 3'-base of the reverse primer is from the 3'-base of the indicated exon

<sup>d</sup>number of bases upstream the last base of the forward primer is from the ATG start codon

<sup>e</sup>number of bases downstream of the first base of the indicated exon

<sup>f</sup>sequences reside in exon 9 of *PEX6*

<sup>g</sup>sequences reside in exon 11 of *PEX6*
